# Supplementary material for: Efficient skyrmion transport mediated by a voltage controlled magnetic anisotropy gradient
Source: Royal Society of Chemistry journal article supplement (doi:10.1039/c7nr06482a), 2017-12-01
Supplement: c7nr06482a4.pdf [file c7nr06482a4.pdf]

### Supplementary 1: Calculation of dissipative force tensor $D$ .

The dissipative tensor  $D$  in Thiele equation can be written as,<sup>1</sup>

$$D_{ij} = \int_{sk} d^2r \partial_i m \cdot \partial_j m = \begin{cases} D & (i, j) = (x, x), (y, y), \\ 0 & \text{otherwise.} \end{cases} \quad (1)$$

In the numerical simulations,  $D$  was observed to change as the skyrmions were driven to the lower  $K_u$  regions, as shown in Fig. S1. This was not considered in the original manuscript for simplicity. Therefore, a small difference between the simulated and analytical trajectories was observed in Fig. 4(d).

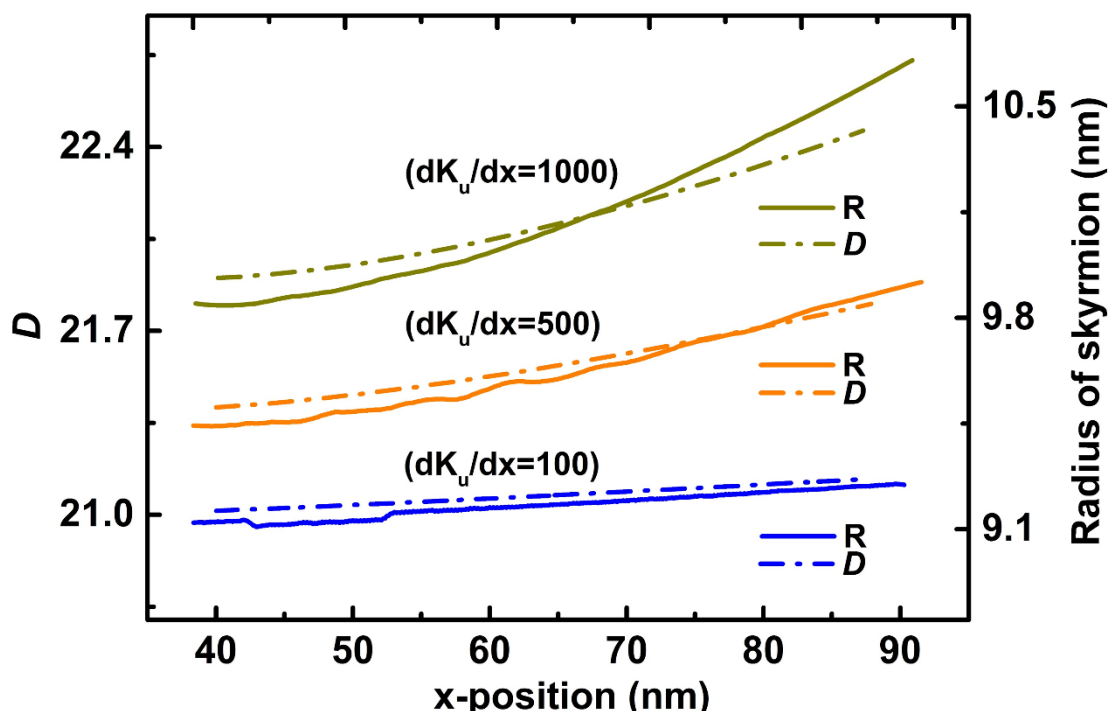

**Supplementary Figure S1.** Dissipative force tensor and radius at different  $x$ -position during skyrmion motion under various  $K_u$  gradients.

### Supplementary 2: Calculation of the coefficient $C(x)$ in the equation of $F_y$ .

For a finite nanowire, the skyrmion trajectory along the  $y$ -axis is determined by the repulsion between the edge and the skyrmion. The repulsive potential acts on the skyrmion as a force ( $F_y$ ). The change in magnetostatic energy along the  $y$ -axis was found by applying a spin-current ( $7 \times 10^{11}$  A/m<sup>2</sup>) along the  $x$ -axis to drive the skyrmion. Under the applied current, the skyrmion experiences a skyrmion Hall effect and drifts in the  $y$ -axis. The system's total magnetostatic energy was then calculated at every  $y$ -position as shown in Fig. S2-1(a), which can be written as,

$$E = A + By^2 \quad (2)$$

Hence, the energy gradient along the  $y$ -axis as well as  $F_y$  can be expressed by,

$$F_y = \frac{dE}{dy} = 2By = Cy \quad (3)$$

where  $C$  is the coefficient when the skyrmion is driven by spin-current along a nanowire where the  $K_u$  remains constant. When a skyrmion is driven by a  $K_u$  gradient, the coefficient is not constant due to the change in the size of the skyrmion, which is in turn determined by  $K_u$ . Hence, in a nanowire with a  $K_u$  gradient along the  $x$ -axis, the coefficient  $C$  is a function of  $x$ , this relation is shown in Fig. S2-1(b). The origins of the inhomogeneous magnetostatic energy landscape can be attributed to the magnetization tilting at the edges. The in-plane magnetization at the edges is opposite of the skyrmion edges. The overlap of the dissimilar magnetization results in a repulsive potential. As shown in Fig. S2-2, an in-plane magnetization exists at the edges which acts to push the skyrmion back to the center of the track.

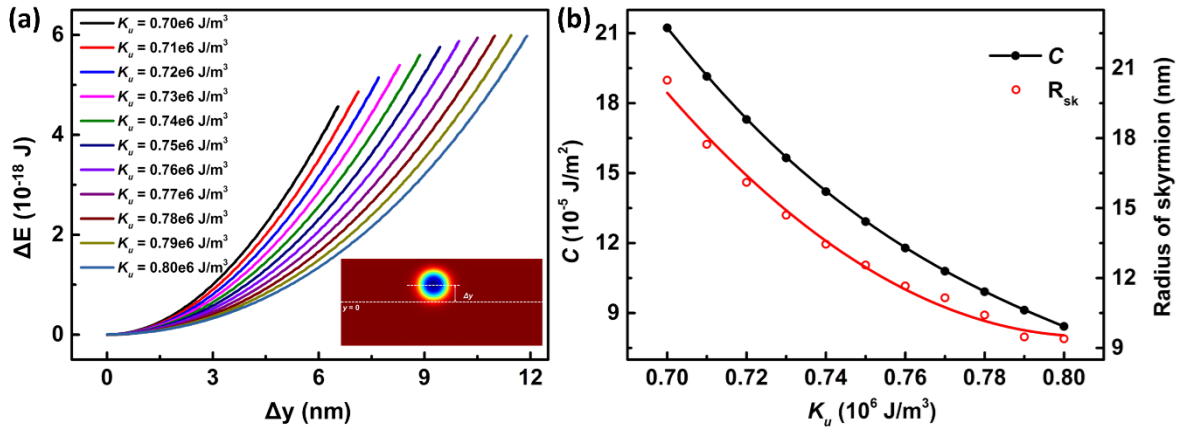

**Supplementary Figure S2-1.** (a) Micromagnetic energy as a function of skyrmion displacement along the  $y$ -axis from the center of the nanowire with various anisotropy constants. Inset is the schematic diagram of the skyrmion displacement along the  $y$ -axis. (b)  $C$  and radius of skyrmion depend on the anisotropy constant. This shows that a low/high anisotropy constant, will result in a larger/smaller skyrmion, resulting in a larger/smaller  $C$ . This trend indicates that  $C$  increases with the increase of  $x$ -position in the system applying a negative anisotropy gradient.

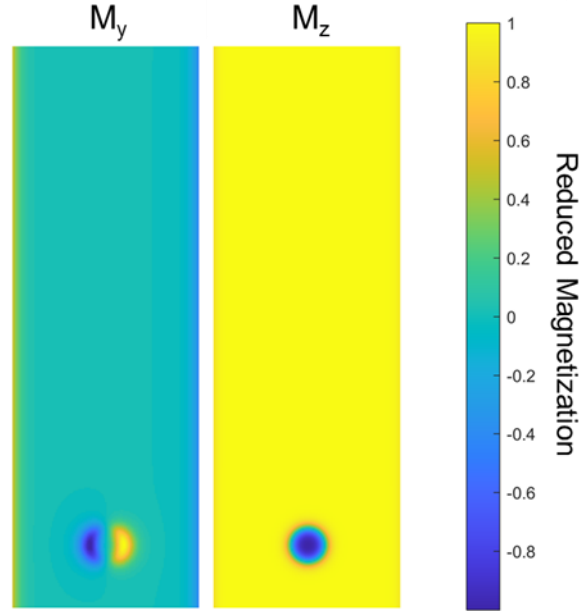

**Supplementary Figure S2-2.** The in-plane ( $M_y$ ) and out-plane ( $M_z$ ) components of skyrmion magnetization

### Supplementary 3. Energy consumption of a VCMA device

The VCMA effect does not require a current in the magnetic layer and is therefore inherently dissipationless. However, a microscopic amount of electrical energy is needed to charge the capacitive dielectric layer. The VCMA efficiency can be expressed as a ratio between induced PMA change and applied electric field  $\frac{\Delta K_u}{\Delta E}$ . As reported by Y. Suzuki et al., a small electric

field of 100 mV/nm can cause a 40% change in  $K_u$  with  $\frac{\Delta K_u}{\Delta E} = 210 \text{ fJ/Vm}^2$ . Using a more

conservative estimate of  $\frac{\Delta K_u}{\Delta E} = 100 \text{ fJ/Vm}$ , we find that for the  $2 \times 10^4 \text{ J/m}^3$  change in the

$K_u$  required by stepped anisotropy gradient, an electric field of 0.1 V/nm needs to be applied across a gate oxide of 1 nm. Using MgO as a gate oxide with a relative permittivity of 7 and an area of  $60 \text{ nm} \times 20 \text{ nm}$ , the energy required to create the electric field is 0.18 aJ. To achieve a speed of 70 m/s, the gate must be charged at a rate of 3.5 GHz. The resulting power consumption of shifting a single skyrmion at 70 m/s is then 0.65 nW.

The energy dissipation in current-driven skyrmion devices can be calculated from the resistive energy losses through Joule heating. Experimental data from S.Rohart et al. shows that a current density of  $5 \times 10^{11} \text{ A/m}^2$  is required to drive a skyrmion at 70 m/s.<sup>3</sup> For comparison purposes, we assume that skyrmions on both systems have a same total magnetic volume. However, for current-driven devices, an additional 4 nm of heavy metal, usually Ta or Pt is added for a strong spin Hall effect required for high speed manipulation. Taking a bulk resistance value of  $1 \times 10^{-7} \text{ } \Omega \text{ m}$ , the power consumed in current-driven skyrmion devices for shifting a single skyrmion at 70 m/s is 0.5  $\mu\text{W}$ .

**Supplementary 4. Skyrmion motion without annihilation.** ( $\frac{dK_u}{dx} = 600 \text{ GJ/m}^4$ )

**Supplementary 5. Annihilation of skyrmion when the skyrmion center is less than 20 nm from the edge.** ( $\frac{dK_u}{dx} = 1200 \text{ GJ/m}^4$ )

**Supplementary 6. Skyrmion motion induced by stepped anisotropy in a racetrack.** The white overlays indicate the position of the potential wells created by the stepped anisotropy.

## Reference

- 1 Seki, S. & Mochizuki, M. *Skyrmions in Magnetic Materials*. (Springer, 2016).
- 2 Maruyama, T. *et al.* 2009, Large voltage-induced magnetic anisotropy change in a few atomic layers of iron. *Nat. Nanotechnol.* **4**, 158-161.
- 3 Hrabec, A. *et al.* 2017, Current-induced skyrmion generation and dynamics in symmetric bilayers. *Nature communications* **8**, ncomms15765.
